# Supplementary material for: Multiscale Analysis and Validation of Effective Drug Combinations Targeting Driver KRAS Mutations in Non-Small Cell Lung Cancer
Source: MDPI journal article supplement (doi:10.3390/ijms24020997), 2023-01-05
Supplement: s1 [file s1]

A dark blue outline of a house, consisting of a triangular roof and a rectangular base. The letters 'MDPI' are centered within the rectangular base.

**MDPI**
