# Supplementary material for: Multiscale Analysis and Validation of Effective Drug Combinations Targeting Driver KRAS Mutations in Non-Small Cell Lung Cancer
Source: MDPI journal article supplement (doi:10.3390/ijms24020997), 2023-01-05
Supplement: s1 [file s1]

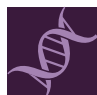

Article

# Supplementary Material: Multiscale Analysis and Validation of Effective Drug Combinations Targeting Driver Kras Mutations in Non-Small Cell Lung Cancer

Liana Bruggemann<sup>1</sup>, Zackary Falls<sup>1</sup>, William Mangione<sup>1</sup>, Stanley A Schwartz<sup>2</sup>, Sebastiano Battaglia<sup>3</sup>, Ravikumar Aalinkeel<sup>2</sup>, Supriya D. Mahajan<sup>2,\*</sup>, Ram Samudrala<sup>1,\*</sup>

<sup>1</sup> Department of Biomedical Informatics, University at Buffalo

<sup>2</sup> Department of Medicine, University at Buffalo

<sup>3</sup> Roswell Park Cancer Institute, Buffalo NY

\* Correspondence: smahajan@buffalo.edu (S.D.M.); ram@compbio.org (R.S.)

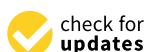

**Citation:** Bruggemann, L.; Falls, Z.; Mangione, W.; Schwartz, S.A.; Battaglia, S.; Aalinkeel, R.; Mahaja, S.D.; Samudrala, R. Supplementary Material: Multiscale Analysis and Validation of Effective Drug Combinations Targeting Driver Kras Mutations in Non-Small Cell Lung Cancer. *Int. J. Mol. Sci.* **2022**, *1*, 0. <https://doi.org/>

Academic Editors: Adam Jarmuła and Piotr Maj

Received: 15 September 2022

Accepted: 6 November 2022

Published: 30 November 2022

**Publisher's Note:** MDPI stays neutral with regard to jurisdictional claims in published maps and institutional affiliations.

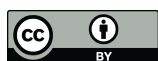

**Copyright:** © 2022 by the authors. Licensee MDPI, Basel, Switzerland. This article is an open access article distributed under the terms and conditions of the Creative Commons Attribution (CC BY) license (<https://creativecommons.org/licenses/by/4.0/>).

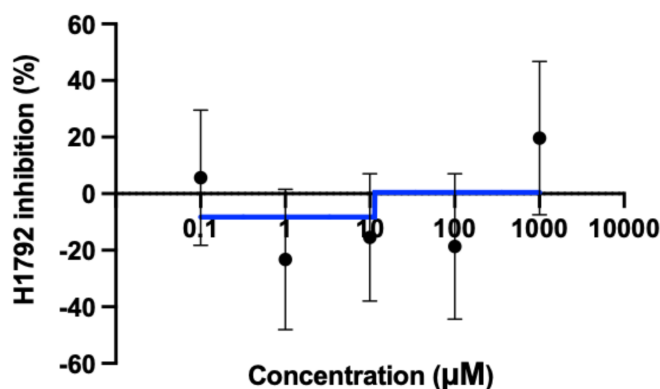

**Figure S1. GI50 for BAY-293.** The concentration (horizontal axis) of osimertinb is plotted against the H1792 cellular inhibition percentage (vertical axis). The GI50, or concentration required for 50% cellular inhibition, for BAY-293 was unable to be calculated with Graphpad prism 9.0, as there was not a strong enough effect. This indicates that BAY-293 is not effective at decreasing cellular proliferation in H1792 as a single agent.

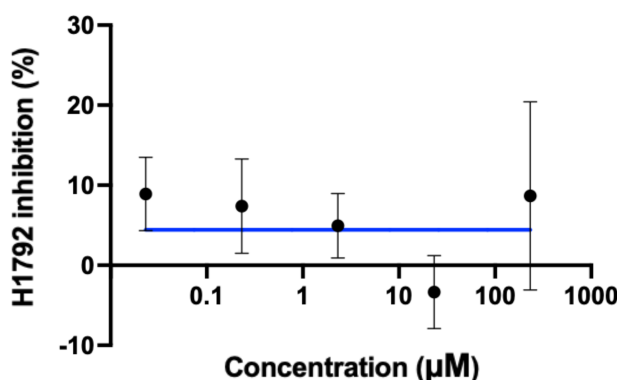

**Figure S2. GI50 for ARS-1620.** The concentration (horizontal axis) of osimertinb is plotted against the H1792 cellular inhibition percentage (vertical axis). The GI50, or concentration required for 50% cellular inhibition, for ARS-1620 was unable to be calculated with Graphpad prism 9.0, as there was not a strong enough effect. This indicates that ARS-1620 is not effective at decreasing cellular proliferation in H1792 as a single agent.

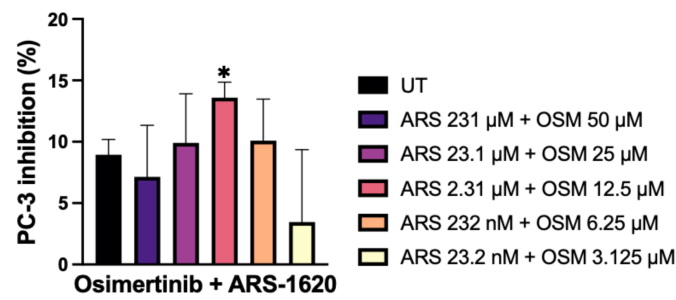

**Figure S3. Cellular proliferation for PC-3 with ARS-1620 + osimertinib.** The concentration (horizontal axis) of osimertinib and ARS-1620 is plotted against the PC-3 cellular inhibition percentage (vertical axis). The third strongest treatment condition was slightly significant ( $p < 0.01$ ). This indicates that the osimertinib and ARS-1620 combination does not inhibit cellular proliferation in PC-3 relative to the untreated control.

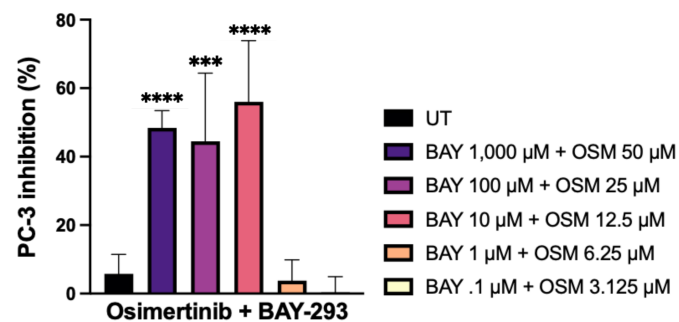

**Figure S4. Cellular proliferation for PC-3 with BAY-293 + osimertinib.** The concentration (horizontal axis) of osimertinib and BAY-293 is plotted against the PC-3 cellular inhibition percentage (vertical axis). The three strongest treatment conditions were all significantly higher ( $p < 0.001$ ) compared to the untreated control. This indicates that while the osimertinib and BAY-293 combination shows some effect at inhibiting PC-3 cellular proliferation, it is far less than the effect observed with H1792.
