# Supplementary figures and images for: Multiscale Analysis and Validation of Effective Drug Combinations Targeting Driver KRAS Mutations in Non-Small Cell Lung Cancer
Source: MDPI journal article supplement (doi:10.3390/ijms24020997), 2023-01-05

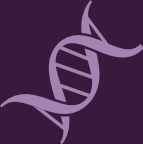

# International Journal of *Molecular Sciences*

Supplement: s1 [file s1]

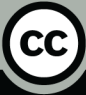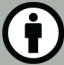

BY

Supplement: s1 [file s1]

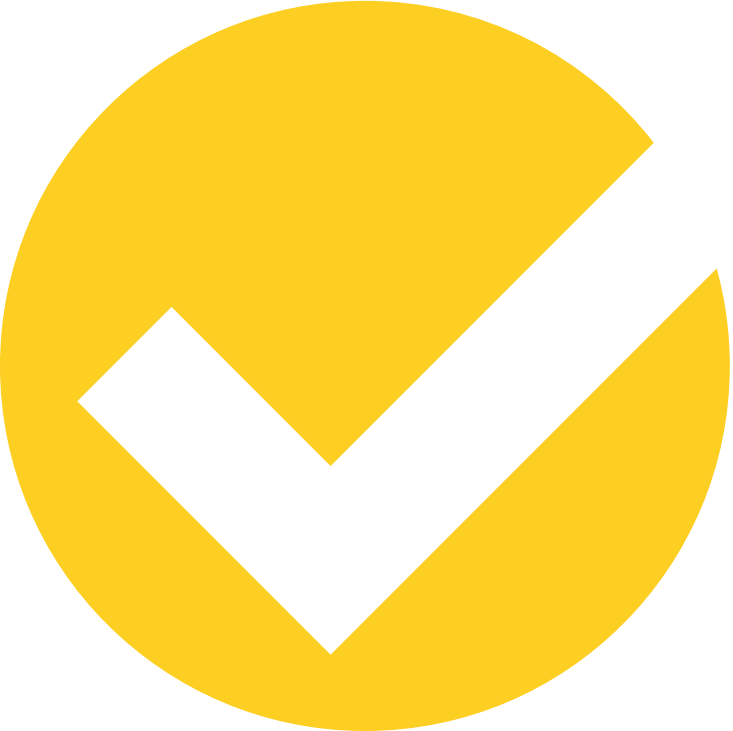

check for  
updates

Supplement: s1 [file s1]
